# Supplementary material for: Peak inflammation in atherosclerosis, primary biliary cirrhosis and autoimmune arthritis is counter-intuitively associated with regulatory T cell enrichment
Source: PubMed Central journal article supplement (PMC4457006; doi:10.1016/j.imbio.2015.02.006), 2015-08
Supplement: mmc1.pdf [file mmc1.pdf]

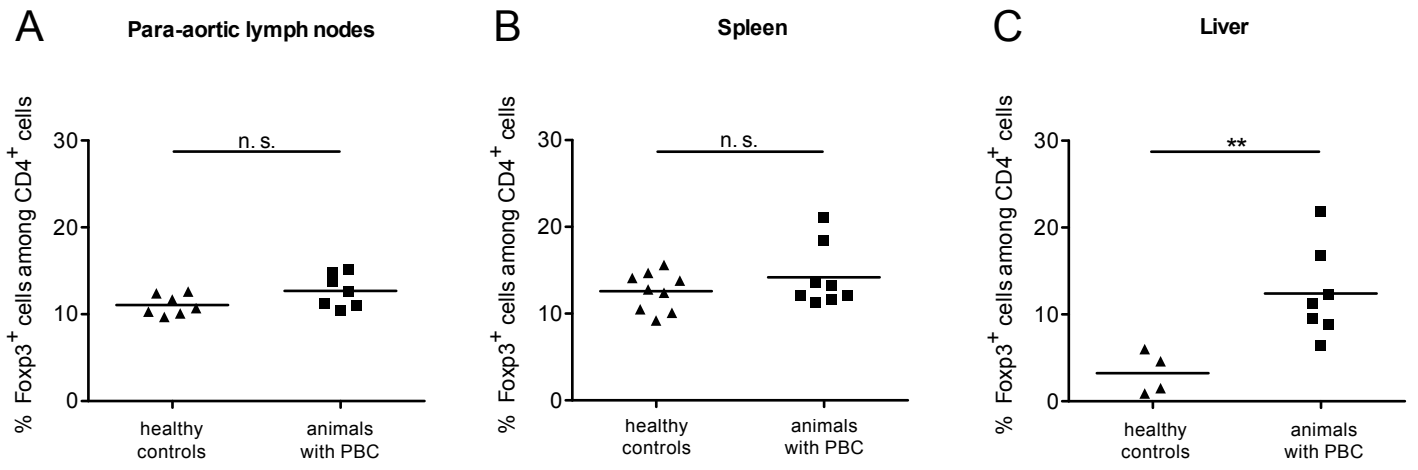

Supplementary Figure 1
